# Supplementary material
Source: PubMed Central journal article supplement (PMC5533172)
Supplement: NIHMS878989-supplement-Supplementary_Material.pdf [file NIHMS878989-supplement-Supplementary_Material.pdf]

# Medical Student Survey 2014-2015

---

1. Your medical school year

- 1st year
- 2nd year
- 3rd year
- 4th year
- Post-Graduate year 1
- Other

2. How likely are you to pursue an oncologic specialty during residency or fellowship?

Not at all likely

- 1

2

3

4

Extremely

likely - 5

3. Have you been awarded or are you currently pursuing any other advanced degrees?

|       |   |
|-------|---|
| PhD   | ▲ |
| None  | ■ |
| MS    | ■ |
| Other | ■ |
| MPH   | ▼ |

4. Is your medical school public or private?



A dropdown menu with a checkered border and arrowheads at the top and bottom. The menu is open, showing four options: Public, Private, Public/Private, and Other.

5. Average class size of your medical school:

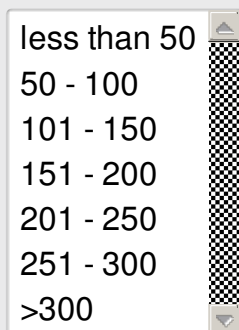

A dropdown menu with a checkered border and arrowheads at the top and bottom. The menu is open, showing seven options: less than 50, 50 - 100, 101 - 150, 151 - 200, 201 - 250, 251 - 300, and >300.

6. State where your medical school is located:

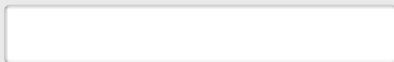

A rectangular text input field with a thin border, currently empty.

**(untitled)**

---

7. Where would you rate your medical school's curriculum on the following scale?

- 1 - Completely Self guided
- 2 - Moderately Self-Guided
- 3 - Equally Structured and Self-Guided
- 4 - Moderately Structured
- 5 - Formally Structured

8. How satisfied are you with your oncology education during the first 3 years of medical school?

- 1 - Not At All Satisfied
- 2 - Slightly Satisfied
- 3 - Moderately Satisfied
- 4 - Very Satisfied
- 5 - Extremely satisfied

9. How much could your oncology education during the first 3 years of medical school be improved?

No  
Improvement  
Needed - 1

2

3

4

Extensive  
Improvement  
Needed - 5

10. If you believe it can be improved, how so? In what areas is it lacking?

**(untitled)**

---

11. Rank the following in terms of the relative amount of time devoted to each in your curriculum (1 = least amount of time, 6 = most amount of time):

|                                                         | 1                     | 2                     | 3                     | 4                     | 5                     | 6                     |
|---------------------------------------------------------|-----------------------|-----------------------|-----------------------|-----------------------|-----------------------|-----------------------|
| <input type="checkbox"/> Accidents/Trauma               | <input type="radio"/> |
| <input type="checkbox"/> Cerebrovascular Disease/Stroke | <input type="radio"/> |
| <input type="checkbox"/> Heart Disease                  | <input type="radio"/> |
| <input type="checkbox"/> Cancer                         | <input type="radio"/> |
| <input type="checkbox"/> Alzheimer's Disease            | <input type="radio"/> |
| <input type="checkbox"/> COPD/Chronic Lung Disease      | <input type="radio"/> |

12. How confident were you in your knowledge of oncology after the first 3 years of medical school in regards to each of the following (1 = not at all confident, 5 = extremely confident):

|                               | 1                     | 2                     | 3                     | 4                     | 5                     |
|-------------------------------|-----------------------|-----------------------|-----------------------|-----------------------|-----------------------|
| Basic Science/Natural History | <input type="radio"/> |
| Workup/Diagnosis              | <input type="radio"/> |
| Treatment                     | <input type="radio"/> |
| Interacting with Oncologists  | <input type="radio"/> |

13. How would you rate your classmates' knowledge of oncology after the first 3 years of medical school in regards to each of the following (1 = poor, 5 = excellent):

|                               | 1                     | 2                     | 3                     | 4                     | 5                     |
|-------------------------------|-----------------------|-----------------------|-----------------------|-----------------------|-----------------------|
| Basic Science/Natural History | <input type="radio"/> |
| Workup/Diagnosis              | <input type="radio"/> |
| Treatment                     | <input type="radio"/> |
| Interacting with Oncologists  | <input type="radio"/> |





18. Rank the following in terms of the relative amount of time each spent teaching your oncology curriculum during the mandatory CLINICAL CLERKSHIPS (1 = least amount of teaching, 5 = most amount of teaching):

|                      | 1                     | 2                     | 3                     | 4                     | 5                     |
|----------------------|-----------------------|-----------------------|-----------------------|-----------------------|-----------------------|
| Medical Oncologist   | <input type="radio"/> |
| Surgical Oncologist  | <input type="radio"/> |
| Radiation Oncologist | <input type="radio"/> |
| Pathologist          | <input type="radio"/> |
| Radiologist          | <input type="radio"/> |
| Scientist/PhD        | <input type="radio"/> |

**(untitled)**

---

19. # of MANDATORY months of clinical clerkships (during the 3rd - 4th year of medical school):

20. # of ELECTIVE months of clinical clerkships (during the 3rd-4th year of medical school):





22. Approximate # of hours per week of didactics (on any topic) during each of the following clerkships:

|                       | 0 hours               | 1-3                   | 4-6                   | 7-9                   | 10-12                 | 13-15                 | >15 hours             |
|-----------------------|-----------------------|-----------------------|-----------------------|-----------------------|-----------------------|-----------------------|-----------------------|
| Internal Medicine     | <input type="radio"/> |
| Surgery               | <input type="radio"/> |
| Pediatrics            | <input type="radio"/> |
| Obstetrics/Gynecology | <input type="radio"/> |
| Family Medicine       | <input type="radio"/> |
| Neurology             | <input type="radio"/> |
| Psychiatry            | <input type="radio"/> |
| Radiology             | <input type="radio"/> |
| Pathology             | <input type="radio"/> |
| Geriatrics            | <input type="radio"/> |

23. Approximate % of patients during each clerkship with a primary diagnosis of cancer:

|                       | 0%                    | 10%                   | 20%                   | 30%                   | 40%                   | 50%                   | 60%                   | 70%                   | 80%                   | 90%                   |
|-----------------------|-----------------------|-----------------------|-----------------------|-----------------------|-----------------------|-----------------------|-----------------------|-----------------------|-----------------------|-----------------------|
| Internal Medicine     | <input type="radio"/> |
| Surgery               | <input type="radio"/> |
| Pediatrics            | <input type="radio"/> |
| Obstetrics/Gynecology | <input type="radio"/> |
| Family Medicine       | <input type="radio"/> |
| Neurology             | <input type="radio"/> |
| Psychiatry            | <input type="radio"/> |
| Radiology             | <input type="radio"/> |
| Pathology             | <input type="radio"/> |
| Geriatrics            | <input type="radio"/> |

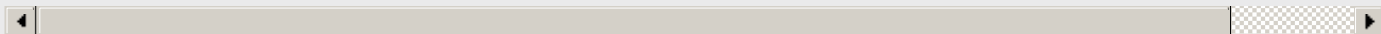

24. Email address for any other student leaders at your institution who you think might be interested in taking this survey:

25. If you are interested in being contacted with updates on this project or follow-up questions regarding educational improvement, please leave your email address below:
